# Supplementary material for: Contribution of prokaryotes and eukaryotes to CO2 emissions in the wastewater treatment process
Source: PeerJ. 2020 Jun 17;8:e9325. doi: 10.7717/peerj.9325 (PMC7305776; doi:10.7717/peerj.9325)
Supplement: Supplemental Information 1 — Emission of CO2 caused by the activity of prokaryotes and eukaryotes in the subsequent seasons. These data were used for statistical analysis to compare emission in each seasons and to estimate the share of eukaryotic organisms in total CO2 emissions during the aeration phase. [file peerj-08-9325-s001.xlsx]

## Sheet: Total emission of CO2
Total emission of CO2 [g/m2*min]
Procaryotes							Eukaryotes
Season	Temp. oC	Day	Emission of CO2 [g/m2*min] - mean of 8 gas samplings daily	Standard deviation	Average	Average SD	Season	Temp. oC	Day	Emission of CO2 [g/m2*min] - mean calculated from 5 microorganisms identifications daily	Standard deviation	Average	Average SD
Summer	20	1	2.27937	0.162038	1.18111	0.197428	Summer	20	1	6.02735e-06	1.12104e-06	7.38521e-06	1.47825e-06
Summer		2	1.56715	0.151947			Summer		2	8.85368e-06	1.1341e-06
Summer		3	1.12498	0.215858			Summer		3	6.33695e-06	1.0382e-06
Summer		4	0.686071	0.248385			Summer		4	6.80008e-06	8.86827e-07
Summer		5	0.637769	0.223805			Summer		5	6.63103e-06	2.19192e-06
Summer		6	0.79131	0.182535			Summer		6	6.43671e-06	2.68638e-06
Autumn	15	1	1.4444	0.424028	1.33646	0.255552	Summer		7	1.06106e-05	1.28929e-06
Autumn		2	1.48131	0.145336			Autumn	15	1	2.67665e-06	2.49634e-07	3.22488e-06	5.10373e-07
Autumn		3	1.75131	0.273535			Autumn		2	3.13491e-06	1.88668e-07
Autumn		4	1.31203	0.296276			Autumn		3	3.42334e-06	3.72918e-07
Autumn		5	1.0874	0.242519			Autumn		4	3.8493e-06	7.57548e-07
Autumn		6	0.942295	0.151618			Autumn		5	3.52925e-06	7.94522e-07
Winter	10	1	0.994567	0.0855758	0.926687	0.0956654	Winter	10	1	1.08488e-06	9.06579e-08	1.00343e-06	1.90087e-07
Winter		2	0.841264	0.0784748			Winter		2	8.63504e-07	1.11772e-07
Winter		3	0.799894	0.0559143			Winter		3	1.07402e-06	2.87004e-07
Winter		4	0.797838	0.0839513			Winter		4	9.91309e-07	2.70913e-07
Winter		5	1.0421	0.148166			Spring	15	1	2.12547e-06	4.63044e-07	2.22258e-06	2.48364e-07
Winter		6	1.08446	0.12191			Spring		2	2.14193e-06	3.35117e-07
Spring	15	1	1.4117	0.520934	1.03673	0.304125	Spring		3	2.24211e-06	1.50611e-07
Spring		2	1.15389	0.394857			Spring		4	2.41123e-06	1.99639e-07
Spring		3	0.937595	0.237963			Spring		5	2.30039e-06	3.17031e-07
Spring		4	0.885803	0.226584			Spring		6	2.29566e-06	5.57539e-08
Spring		5	0.955734	0.211994			Spring		7	2.04125e-06	2.17353e-07
Spring		6	0.875661	0.232419
